# Supplementary material for: Cross-Sectional and Longitudinal Associations between Forearm Bone Mineral Density and Anthropometry in Adult Japanese Men and Women
Source: PubMed Central journal article supplement — J Bone Metab. 2024 Feb 29;31(1):21–30. doi: 10.11005/jbm.2024.31.1.21 (PMC10940109; doi:10.11005/jbm.2024.31.1.21), 2024-02-29
Supplement: jbm-2024-31-1-21-Supplementary-Table-1.pdf [file jbm-2024-31-1-21-Supplementary-Table-1.pdf]

**Supplementary Table 1.** Simple linear regression analysis of anthropometric measurements

|         | Height vs. Weight   | Weight vs. BMI      |
|---------|---------------------|---------------------|
| Men     |                     |                     |
| Younger | 0.384 <sup>a)</sup> | 0.891 <sup>a)</sup> |
| Elder   | 0.563 <sup>a)</sup> | 0.855 <sup>a)</sup> |
| Women   |                     |                     |
| Younger | 0.307 <sup>a)</sup> | 0.888 <sup>a)</sup> |
| Elder   | 0.371 <sup>a)</sup> | 0.869 <sup>a)</sup> |

Values are Pearson's correlation coefficient.

<sup>a)</sup> $P < 0.01$ .

BMI, body mass index.
